# Supplementary material for: Does bariatric surgery influence plasma levels of fetuin-A and leukocyte cell-derived chemotaxin-2 in patients with type 2 diabetes mellitus?
Source: PeerJ. 2018 Jun 12;6:e4884. doi: 10.7717/peerj.4884 (PMC6003398; doi:10.7717/peerj.4884)
Supplement: Supplemental Information 1 [file peerj-06-4884-s001.xlsx]

## Sheet: Sheet 1
Surgery	Gender	Diabetes duration	Age _M0	Height_M0	Height_M12	Weight_M0	Weight_M12	BMI_M0	BMI_M12		Waist_M0	Waist_M12	Hip_M0	Hip_M12	Waist-Hip Ratio_M0	Waist-Hip Ratio_M12		Excess weight	weight loss-M12	Excess weight loss %-M12		ABSI_M0	ABSI_M12		smoking_M0	drinking_M0		Total Cholesterol_M0	Total Cholesterol_M12		Triglycerides_M0	Triglycerides_M12		High density lipoproteins _M0	High density lipoproteins _M12		Low density lipoproteins _M0	Low density lipoproteins _M12		(FBS) Glucose_M0	(FBS) Glucose_M12		HbA1c_M0	HbA1c_M12
		B-79		B-6		B-5					B-10		B-11		B-12													B-53			B-54			B-66			B-77			B-52			B-67
(SG:1;GB:2)	(M:1;F:0)	(Year)	(Year)	(cm)	(cm)	(kg)	(kg)	(kg/m2)	(kg/m2)		(cm)	(cm)	(cm)	(cm)				(kg)	(kg)	(%)					Yes:1;No:0	Yes:1;No:0		(mg/dL)	(mg/dL)		(mg/dL)	(mg/dL)		(mg/dL)	(mg/dL)		(mg/dL)	(mg/dL)		(mg/dL)	(mg/dL)		(%)	(%)
2	0	11	37	162.5	162.5	74	68	28.0237	25.7515	-2.27219	95	87	104	100	0.913462	0.93	0.0165385	15.9062	6	0.37721		0.0807756	0.0782632	-0.00251238	0	0		284	206	-78	612	262	-350	38	37	-1	143	145	2	218	224	6	9.6	7.9	-1.7
2	0	3	44	161	161	90	64.8	34.7209	24.999	-9.72185	104	81	122	X	0.852459	X	#VALUE!	32.9738	25.2	0.764243		0.0770123	0.0746661	-0.0023462	0	0		196	177	-19	176	74	-102	57	59	2	120	105	-15	251	95	-156	10.9	6.1	-4.8
2	1	6	39	174	174	88	74.1	29.0659	24.4748	-4.5911	105	85	108	97	0.972222	0.876289	-0.0959336	21.3928	13.9	0.649751		0.0842025	0.0764418	-0.0077607	0	0		148	142	-6	70	74	4	43	43	0	96	87	-9	161	78	-83	11.8	6.3	-5.5
2	0	5	28	160	160	90.4	74	35.3125	28.9062	-6.40625	113	82.5	119	96	0.94958	0.859375	-0.0902048	34.08	16.4	0.481221		0.0829977	0.0692468	-0.013751	0	0		270	167	-103	207	102	-105	51	38	-13	199	118	-81	247	84	-163	11.1	4.9	-6.2
2	0	1	32	164	X	65	58	24.1672	#VALUE!	#VALUE!	86	74	97	91	0.886598	0.813187	-0.0734111	5.8288	7	1.20093		0.0803389	#VALUE!	#VALUE!	0	0		169	151	-18	164	112	-52	40	32	-8	103	102	-1	124	113	-11	7.8	7.5	-0.3
2	0	7	40	156	155.5	68	53.1	27.9421	21.9601	-5.98207	104	77	106	98	0.981132	0.785714	-0.195418	14.4608	14.9	1.03037		0.090427	0.0787414	-0.0116856	0	0		145	152	7	148	69	-79	31	47	16	98	92	-6	160	79	-81	7.7	5.2	-2.5
2	0	4	38	162		83.2	57	31.7025	#DIV/0!	#DIV/0!	109	85	113	99	0.964602	0.858586	-0.106016	25.4632	26.2	1.02894		0.0854949	#DIV/0!	#DIV/0!	1	0		228	152	-76	230	86	-144	47	50	3	155	96	-59	131	123	-8	8.7	7.5	-1.2
2	0	4	48	160.5	160	71.2	60.6	27.6395	23.6719	-3.96761	87	78	99	93	0.878788	0.83871	-0.0400782	14.5275	10.6	0.729653		0.0751211	0.0747962	-0.000324879	1	0		222	201	-21	167	90	-77	49	57	8	148	124	-24	131	112	-19	7.2	5.9	-1.3
2	0	1	53	155	155	63.1	52.5	26.2643	21.8522	-4.41207	93	77	98	85	0.94898	0.905882	-0.0430972	10.245	10.6	1.03465		0.0845421	0.0791275	-0.00541459	0	0		180	203	23	147	113	-34	43	47	4	127	144	17	170	113	-57	10.4	7.1	-3.3
2	0	3	51	164	163.7	65	64.5	24.1672	24.0692	-0.0979236	91	80	96	89	0.947917	0.898876	-0.0490403	5.8288	0.5	0.0857809		0.0850098	0.0750051	-0.0100047	0	0		206	129	-77	86	72	-14	48	47	-1	154	77	-77	110	103	-7	9.1	7.1	-2
2	0	1.3	36	169	169	87	73.7	30.4611	25.8044	-4.6567	111	93	106	103	1.04717	0.902913	-0.144257	24.1658	13.3	0.550365		0.0875419	0.0819238	-0.00561803	1	0		167	164	-3	337	132	-205	28	33	5	95	110	15	157	93	-64	10	6.2	-3.8
2	0	6	34	158	158	80	69.7	32.0461	27.9202	-4.12594	110	95	115	97	0.956522	0.979381	0.0228597	25.0792	10.3	0.410699		0.0867388	0.0821201	-0.00461877	0	0		150	169	19	196	95	-101	39	43	4	96	111	15	254	139	-115	10.4	6.8	-3.6
2	0	1	46	158.5	158.3	87.35	60.7	34.77	24.2229	-10.547	112	80	119	90	0.941176	0.888889	-0.0522876	32.081	26.65	0.830708		0.0835091	0.0759507	-0.00755843	0	0		141	134	-7	116	55	-61	36	38	2	84	84	0	119	89	-30	7.2	5.5	-1.7
2	0	4	47	155	X	97.9	65.3	40.7492	#VALUE!	#VALUE!	116	84.5	132	102	0.878788	0.828431	-0.0503565	45.045	32.6	0.723721		0.0786827	#VALUE!	#VALUE!	0	0		198	158	-40	101	49	-52	47	54	7	135	84	-51	124	95	-29	8.7	5.4	-3.3
2	0	3	61	152	150.4	74.05	58	32.0507	25.6408	-6.40988	97	75	96	90	1.01042	0.833333	-0.177083	23.2212	16.05	0.691179		0.0779755	0.0703314	-0.00764409				161	184	23	169	173	4	48	52	4	85	116	31	159	119	-40	9.1	6.7	-2.4
2	1		43	174	175.3	97.1	72.6	32.0716	23.6251	-8.44656	103	84	112	99	0.92	0.85	-0.07	30.4928	24.5	0.803468		0.0773539	0.077056	-0.00029788				253	181	-72	306	88	-218	43	49	6	140	119	-21	121	96	-25	7.4	5.8	-1.6
2	1		42	179	178.1	113.6	90.4	35.4546	28.4997	-6.95485	110	89	109	103	1	0.86	-0.14	43.1098	23.2	0.538161		0.0761818	0.0714767	-0.00470515				190			185			40			113			175	101	-74	8.3	6.1	-2.2
2	0		51	157	X	93.65	X	37.9934	#VALUE!	#VALUE!	123	X	128	X	0.96	X		39.4222	#VALUE!	#VALUE!		0.0868593	#VALUE!	#VALUE!				220			181			48			142			148			6.7
1	1	0	43	172	171.9	111	90.1	37.5203	30.4911	-7.02919	122.5	92	121	104	1.0124	0.884615	-0.127781	45.9152	20.9	0.455187		0.0833415	0.0718954	-0.0114461	0	1		163	139	-24	90	77	-13	42	41	-1	109	91	-18	199	69	-130	9.4	5.7	-3.7
1	1	1	25	162	162	90.2	67	34.3698	25.5296	-8.84012	97	78	108	95	0.898148	0.821053	-0.0770955	32.4632	23.2	0.714655		0.0720936	0.0706817	-0.00141183	0	0		198	188	-10	160	57	-103	46	65	19	135	101	-34	88	92	4	6.2	5.5	-0.7
1	1	1	35	175.5	174	80.8	67	26.2336	22.1297	-4.10381	96	83	100	95	0.96	0.873684	-0.0863158	13.0395	13.8	1.05833		0.0820782	0.0798275	-0.00225071	0	0		200	215	15	482	115	-367	34	49	15	106	151	45	205	134	-71	8.5	7.2	-1.3
1	1	2	59	163.5	163	94.4	67.4	35.3132	25.3679	-9.94524	116	88	111	104	1.04505	0.846154	-0.198891	35.5891	27	0.75866		0.0842833	0.0798361	-0.00444723	0	0		193	153	-40	251	90	-161	24	49	25	137	92	-45	84	106	22	7.6	6.1	-1.5
1	1	3	34	168	170	105.4	69.8	37.3441	24.1522	-13.1919	106	83	107	93	0.990654	0.892473	-0.0981811	43.3072	35.6	0.822034		0.0731987	0.0761872	0.00298851	0	0		234	205	-29	555	67	-488	33	61	28	110	123	13	249	92	-157	10.9	5.6	-5.3
1	0	1.5	30	154	153.5	74.5	54.3	31.4134	23.0453	-8.36805	101	X	103.5	X	0.975845	X	#VALUE!	22.3248	20.2	0.904823		0.0817494	#VALUE!	#VALUE!	0	0		173	170	-3	133	102	-31	48	48	0	115	102	-13	162	80	-82	8.4	6	-2.4
1	1	0	32	176	176	146.7	107.8	47.3592	34.8011	-12.5581	132	107	128	117	1.03125	0.91453	-0.11672	78.5528	38.9	0.495208		0.0760118	0.0756656	-0.000346208	1	0		216	187	-29	259	127	-132	46	39	-7	168	132	-36	239	83	-156	11.7	5.5	-6.2
1	0	6	59	156	158	82.85	56	34.0442	22.4323	-11.6119	105	74	127	96.5	0.826772	0.766839	-0.0599323	29.3108	26.85	0.916045		0.0800322	0.0740151	-0.00601706	0	0		172	153	-19	86	60	-26	39	58	19	107	82	-25	90	86	-4	7.5	5.7	-1.8
1	1	10	38	176	176	101.55	88.3	32.7834	28.5059	-4.27751	106	75	113	106	0.938053	0.707547	-0.230506	33.4028	13.25	0.396673		0.0780033	0.0605826	-0.0174207	1	1		164	174	10	172	134	-38	29	31	2	119	124	5	118	107	-11	6.3	6.1	-0.2
1	1	3	36	176	176	109.04	80.9	35.2014	26.117	-9.08445	110	85	118	120	0.932203	0.708333	-0.22387	40.8928	28.14	0.688141		0.0771962	0.0727859	-0.00441034	0	0		291	215	-76	500	120	-380	38	53	15	167	144	-23	94	85	-9	6.8	5.6	-1.2
1	1	4	36	177	177	125.9	108	40.1864	34.4729	-5.71356	131	117	121	125	1.08264	0.936	-0.146645	56.9762	17.9	0.314166		0.0839264	0.0830261	-0.000900331				180	223	43	321	155	-166	35	43	8	91	156	65	166	77	-89	9.2	5.6	-3.6
1	0		44	162.5	162.3	123.6	90.6	46.8071	34.3947	-12.4124	114	99	130	109	0.88	0.91	0.03	65.5062	33	0.503769		0.0688552	0.0734765	0.00462126				179	135	-44	195	96	-99	28			103	77	-26	73	84	11	6.4	6	-0.4
1	1		37	174.5	172.9	102.5	80.2	33.6615	26.8278	-6.83371	103	80	113	95	0.91	0.84	-0.07	35.5095	22.3	0.628002		0.0747913	0.0678895	-0.00690171				111	149	38	252	104	-148	37	51	14	42	85	43	165	84	-81	10.6	5.7	-4.9
1	1		33	174.5	X	99.4	X	32.6434	#VALUE!	#VALUE!	114	X	118	X	0.97	X		32.4095	#VALUE!	#VALUE!		0.0844909	#VALUE!	#VALUE!				161		-161	133			25			116			84			8.7
1	0		41	162	162	94.45	61.2	35.9892	23.3196	-12.6696	105	77	115	92	0.91	0.84	-0.07	36.7132	33.25	0.905669		0.0756805	0.0741172	-0.00156328				232	188	-44	126	58	-68	46	61	15	157	107	-50	141	88	-53	7.4	5.8	-1.6
1	0		36	162.5	X	90.1	X	34.1207	#VALUE!		104	X	117	X	0.89	X		32.0062	#VALUE!	#VALUE!		0.0775523	#VALUE!					142			95			36			87			85			6
